# Supplementary material for: Modeling Structure-Function Relationships in Synthetic DNA Sequences using Attribute Grammars
Source: PubMed Central journal article supplement (PMC2748682; doi:10.1371/journal.pcbi.1000529), 2009-10-09
Supplement: pcbi.1000529.s002.pdf [file pcbi.1000529.s002.pdf]

| Part Name | Part Type        | Associated Attribute               | Attribute Value                              |
|-----------|------------------|------------------------------------|----------------------------------------------|
| ptrc2     | Promoter         | promoter.name                      | ptrc2                                        |
|           |                  | promoter.transcription_rate        | 25                                           |
|           |                  | promoter.leakiness_rate            | .25                                          |
|           |                  | promoter.repressor_list            | [[lacI, 4, 0.001, 1], [lacIrc, 4, 0.001, 1]] |
| pls1con   | Promoter         | promoter.name                      | pls1con                                      |
|           |                  | promoter.transcription_rate        | 50                                           |
|           |                  | promoter.leakiness_rate            | 0.00833333                                   |
|           |                  | promoter.repressor_list            | [[cIts, 2, 0.1, 1], [cIsrc, 2, 0.1, 1]]      |
| pltet01   | Promoter         | promoter.name                      | tetR                                         |
|           |                  | promoter.transcription_rate        | 10                                           |
|           |                  | promoter.leakiness_rate            | 0.1                                          |
|           |                  | promoter.repressor_list            | [[tetR, 2, 0.1, 1], [tetRrc, 2, 0.1, 1]]     |
| ptrc2rc   | Reverse Promoter | reversePromoter.name               | ptrc2rc                                      |
|           |                  | reversePromoter.transcription_rate | 25                                           |
|           |                  | reversePromoter.leakiness_rate     | .25                                          |
|           |                  | reversePromoter.repressor_list     | [[lacI, 4, 0.001, 1], [lacIrc, 4, 0.001, 1]] |
| pls1conrc | Reverse Promoter | reversePromoter.name               | pls1conrc                                    |
|           |                  | reversePromoter.transcription_rate | 50                                           |
|           |                  | reversePromoter.leakiness_rate     | 0.00833333                                   |
|           |                  | reversePromoter.repressor_list     | [[cIts, 2, 0.1, 1], [cIsrc, 2, 0.1, 1]]      |
| pltet01rc | Reverse Promoter | reversePromoter.name               | tetRrc                                       |
|           |                  | reversePromoter.transcription_rate | 10                                           |
|           |                  | reversePromoter.leakiness_rate     | 0.1                                          |
|           |                  | reversePromoter.repressor_list     | [[tetR, 2, 0.1, 1], [tetRrc, 2, 0.1, 1]]     |
| rbsA      | RBS              | rbs.name                           | rbsA                                         |
|           |                  | rbs.translation_rate               | 25                                           |
| rbsB      | RBS              | rbs.name                           | rbsB                                         |
|           |                  | rbs.translation_rate               | 50                                           |
| rbsC      | RBS              | rbs.name                           | rbsC                                         |
|           |                  | rbs.translation_rate               | 10                                           |
| rbsD      | RBS              | rbs.name                           | rbsD                                         |
|           |                  | rbs.translation_rate               | 12.5                                         |
| rbsE      | RBS              | rbs.name                           | rbsE                                         |
|           |                  | rbs.translation_rate               | 6.25                                         |
| rbsF      | RBS              | rbs.name                           | rbsF                                         |
|           |                  | rbs.translation_rate               | 7                                            |
| rbsG      | RBS              | rbs.name                           | rbsG                                         |
|           |                  | rbs.translation_rate               | 5                                            |
| rbsH      | RBS              | rbs.name                           | rbsH                                         |
|           |                  | rbs.translation_rate               | 2                                            |
| rbsArc    | Reverse RBS      | reverseRBS.name                    | rbsA                                         |
|           |                  | reverseRBS.translation_rate        | 25                                           |
| rbsBrc    | Reverse RBS      | reverseRBS.name                    | rbsB                                         |
|           |                  | reverseRBS.translation_rate        | 50                                           |
| rbsCrc    | Reverse RBS      | reverseRBS.name                    | rbsC                                         |
|           |                  | reverseRBS.translation_rate        | 10                                           |
| rbsDrc    | Reverse RBS      | reverseRBS.name                    | rbsD                                         |
|           |                  | reverseRBS.translation_rate        | 12.5                                         |
| rbsErc    | Reverse RBS      | reverseRBS.name                    | rbsE                                         |
|           |                  | reverseRBS.translation_rate        | 6.25                                         |

|           |                    |                                      |           |
|-----------|--------------------|--------------------------------------|-----------|
| rbsFrc    | Reverse RBS        | reverseRBS.name                      | rbsF      |
|           |                    | reverseRBS.translation_rate          | 7         |
| rbsGrc    | Reverse RBS        | reverseRBS.name                      | rbsG      |
|           |                    | reverseRBS.translation_rate          | 5         |
| rbsHrc    | Reverse RBS        | reverseRBS.name                      | rbsH      |
|           |                    | reverseRBS.translation_rate          | 2         |
| lacI      | Gene               | gene.name                            | lacI      |
|           |                    | gene.mRNA_degradation_rate           | 1         |
|           |                    | gene.protein_degradation_rate        | 0.1       |
| gfpmut3   | Gene               | gene.name                            | gfpmut3   |
|           |                    | gene.mRNA_degradation_rate           | 1         |
|           |                    | gene.protein_degradation_rate        | 0.1       |
| cIts      | Gene               | gene.name                            | cIts      |
|           |                    | gene.mRNA_degradation_rate           | 1         |
|           |                    | gene.protein_degradation_rate        | 0.1       |
| tetR      | Gene               | gene.name                            | tetR      |
|           |                    | gene.mRNA_degradation_rate           | 1         |
|           |                    | gene.protein_degradation_rate        | 0.1       |
| lacIrc    | Reverse Gene       | reverseGene.name                     | lacIrc    |
|           |                    | reverseGene.mRNA_degradation_rate    | 1         |
|           |                    | reverseGene.protein_degradation_rate | 0.1       |
| gfpmut3rc | Reverse Gene       | reverseGene.name                     | gfpmut3rc |
|           |                    | reverseGene.mRNA_degradation_rate    | 1         |
|           |                    | reverseGene.protein_degradation_rate | 0.1       |
| cItsrc    | Reverse Gene       | reverseGene.name                     | cItsrc    |
|           |                    | reverseGene.mRNA_degradation_rate    | 1         |
|           |                    | reverseGene.protein_degradation_rate | 0.1       |
| tetRrc    | Reverse Gene       | reverseGene.name                     | tetRrc    |
|           |                    | reverseGene.mRNA_degradation_rate    | 1         |
|           |                    | reverseGene.protein_degradation_rate | 0.1       |
| b0010     | Terminator         | none                                 |           |
| b0012     | Terminator         | none                                 |           |
| b0016     | Terminator         | none                                 |           |
| b0010rc   | Reverse Terminator | none                                 |           |
| b0012rc   | Reverse Terminator | none                                 |           |
| b0016rc   | Reverse Terminator | none                                 |           |

**Table S2: List of parts used in the "exploration of genetic space" section and values of associated attributes.**
