# Supplementary material for: Modeling Structure-Function Relationships in Synthetic DNA Sequences using Attribute Grammars
Source: PLoS Comput Biol. 2009 Oct 9;5(10):e1000529. doi: 10.1371/journal.pcbi.1000529 (PMC2748682; doi:10.1371/journal.pcbi.1000529)
Supplement: Table S1 — Computation dependence corresponding to the derivation tree in Fig. 2 The computation starts from the leaves of the tree, and the semantic values computed are transferred to upstream nodes. The computation of each node cannot proceed until all of its sub-trees are computed. For example, the computation of semantic values of (2) is pending until its subtrees (3) and (4) are computed. (0.01 MB PDF) [file pcbi.1000529.s001.pdf]

| No. | Semantic Actions                                                                                                                                                                                                                                                                                                                                                                                                                                                                                                                                  | Dependence |
|-----|---------------------------------------------------------------------------------------------------------------------------------------------------------------------------------------------------------------------------------------------------------------------------------------------------------------------------------------------------------------------------------------------------------------------------------------------------------------------------------------------------------------------------------------------------|------------|
| 9   | <code>promoter1.name = [pro_u]</code>                                                                                                                                                                                                                                                                                                                                                                                                                                                                                                             | N/A        |
| 10  | <code>rbs1.name = [rbsA]</code>                                                                                                                                                                                                                                                                                                                                                                                                                                                                                                                   | N/A        |
| 11  | <code>gene1.name = [v]</code>                                                                                                                                                                                                                                                                                                                                                                                                                                                                                                                     | N/A        |
| 12  | <code>terminator1.name = [t1]</code>                                                                                                                                                                                                                                                                                                                                                                                                                                                                                                              | N/A        |
| 13  | <code>promoter2.name = [pro_v]</code>                                                                                                                                                                                                                                                                                                                                                                                                                                                                                                             | N/A        |
| 14  | <code>rbs2.name = [rbsB]</code>                                                                                                                                                                                                                                                                                                                                                                                                                                                                                                                   | N/A        |
| 15  | <code>gene2.name = [u]</code>                                                                                                                                                                                                                                                                                                                                                                                                                                                                                                                     | N/A        |
| 16  | <code>terminator2.name = [t1]</code>                                                                                                                                                                                                                                                                                                                                                                                                                                                                                                              | N/A        |
| 4   | <code>cistron1.transcript = rbs1.name + gene1.name = [rbsA_v]</code><br><code>cistron1.equation_list = translation(rbsA, v)</code>                                                                                                                                                                                                                                                                                                                                                                                                                | 10, 11     |
| 8   | <code>cistron2.transcript = rbs2.name + gene2.name = [rbsB_u]</code><br><code>cistron2.equation_list = translation(rbsB, u)</code>                                                                                                                                                                                                                                                                                                                                                                                                                | 14, 15     |
| 7   | <code>restConstruct2.equation_list = [ ]</code>                                                                                                                                                                                                                                                                                                                                                                                                                                                                                                   | N/A        |
| 2   | <code>cassette1.promoter_list = [promoter.name, cistron.transcript] = [pro_u, rbsA_v]</code><br><code>cassette1.equation_list = promoter_protein_interaction(cassette1.promoter_list, cassette1.protein_list) + transcription(promoter, cistron1.transcript) + cistron1.equation_list = promoter_protein_interaction([pro_u, rbsA_v], cassette1.protein_list) + transcription(pro_u, rbsA_v) + translation(rbsA, v)</code>                                                                                                                        | 4, 9, 12   |
| 6   | <code>cassette2.promoter_list = [promoter.name, cistron.transcript] = [pro_v, rbsB_u]</code><br><code>cassette2.equation_list = promoter_protein_interaction(cassette2.promoter_list, cassette2.protein_list) + transcription(promoter, cistron2.transcript) + cistron2.equation_list = promoter_protein_interaction([pro_v, rbsB_u], cassette2.protein_list) + transcription(pro_v, rbsB_u) + translation(rbsB, u)</code>                                                                                                                        | 8, 13, 16  |
| 5   | <code>construct2.equation_list = cassette2.equation_list + restConstructs2.equation_list = translation(rbsB, u) + transcription(pro_v, rbsB_u) + promoter_protein_interaction([pro_v, rbsB_u], cassette2.protein_list)</code>                                                                                                                                                                                                                                                                                                                     | 6, 7       |
| 3   | <code>restConstructs1.equations_list = construct2.equation_list = translation(rbsB, u) + transcription(pro_v, rbsB_u) + promoter_protein_interaction([pro_v, rbsB_u], cassette2.protein_list)</code>                                                                                                                                                                                                                                                                                                                                              | 5          |
| 1   | <code>cassette1.protein_list = constructs1.protein_list = [protein_u, protein_v]</code><br><code>cassette2.protein_list = constructs1.protein_list = [protein_u, protein_v]</code><br><code>constructs1.equation_list = cassette1.equation_list + restConstructs.equation_list = transcription(pro_u, rbsA_v) + translation(rbsA, v) + transcription(pro_v, rbsB_u) + translation(rbsB, u) + promoter_protein_interaction([pro_u, rbsA_v], [protein_u, protein_v]) + promoter_protein_interaction([pro_v, rbsB_u], [protein_u, protein_v])</code> | 2, 3       |

**Table S1:** Computation dependence corresponding to the derivation tree in Fig. 2. The computation starts from the leaves of the tree, and the semantic values computed are transferred to upstream nodes. The computation of each node cannot proceed until all of its sub-trees are computed. For example, the computation of semantic values of <constructs1> (2) is pending until its subtrees <cassette1> (3) and <restConstructs1> (4) are computed. The ‘+’ symbol indicated the concatenation operation for two lists.
